# Supplementary material for: In situ preparation of MOF-derived Fe2O3 nanorods for visible-light-driven oxygen evolution
Source: Royal Society of Chemistry journal article supplement (doi:10.1039/d3cy01377d), 2023-01-01
Supplement: d3cy01377d1.pdf [file d3cy01377d1.pdf]

## Supporting Information

### **In Situ Preparation of MOF-derived Fe<sub>2</sub>O<sub>3</sub> Nanorods for Visible-Light-Driven Oxygen Evolution**

Heng Wu,<sup>a, c</sup> Longjie Lai,<sup>c</sup> Zhengdao Li,<sup>b\*</sup> Jiyue Hu,<sup>c</sup> Li Zhang,<sup>d</sup> Waqar Younas,<sup>c</sup> and Qi Liu<sup>c\*</sup>

<sup>a</sup> School of Mechanical Engineering, Anhui Institute of Information Technology, Wuhu, Anhui 241100, China.

<sup>b</sup> Chemistry and Pharmaceutical Engineering College, Nanyang Normal University, Nanyang 473061, China.

<sup>c</sup> School of Materials Science and Engineering, Anhui Polytechnic University, Wuhu 241000, China.

<sup>d</sup> Faculty of Institute of Photoelectronics Thin Film Devices and Technique of Nankai University, Nankai University, Tianjin 30071, China

\* Corresponding author: modieer\_67@ahpu.edu.cn; nylzd@nynu.edu.cn

## 1 Experimental

### 1.1 Materials

Hexahydrate ferric chloride ( $\text{FeCl}_3 \cdot 6\text{H}_2\text{O}$ ) and terephthalic acid ( $\text{H}_2\text{BDC}$ ) were purchased from Sigma-Aldrich. All reagents utilized in this study were of analytical grade and employed without the need for additional purification. Distilled water used in the experiments was prepared using a distilled water purification system.

### 1.2 Characterization

The phase structures of prepared samples were studied with an X-ray diffractometer with Cu  $K\alpha$  radiation of  $\lambda = 1.5406 \text{ \AA}$ . Field-emission scanning electron microscopy (FESEM) were tested by S-4800 (Japan) instrument. The TEM data was measured using JEOL JEM-2100 F (USA). UV visible light adsorption spectra using a Shimadzu UV-3600 with 0.1 nm data interval in the range of 200-800 nm. FT-IR spectra were recorded using a Bruker EQUINOX-55 FTIR instrument in the range of 400-4000  $\text{cm}^{-1}$ . Thermogravimetric analysis (TGA) was conducted in the 30-800  $^\circ\text{C}$  range at a 10  $^\circ\text{C}/\text{min}$  heating rate under air flow using a PerkinElmer TGA 4000 thermal analyzer.

### 1.3 Electrochemical measurements

The electrochemical measurements were recorded at room temperature (25 $^\circ\text{C}$ ) in cell quartz with three-electrode system configurations (thin-film FTO as a working electrode, Ag/AgCl as the reference electrode, and Pt mesh as the counter electrode). 0.1 M  $\text{Na}_2\text{SO}_4$  solution was used as the supporting electrolyte. The light source was a 300 W Xenon lamp (PLS-SXE300). The Nyquist plots were measured in the frequency range between 0.01 and  $10^5$  Hz at 1.23 V vs. RHE under dark conditions with an AC voltage perturbation of 10 mV. The applied potential was converted to the RHE values using the following Nernst equations:

$$E_{(RHE)} = E_{(Ag/AgCl)} + E_{(Ag/AgCl \text{ vs RHE})} + 0.059 \times pH$$

$$E_{(Ag/AgCl \text{ vs NHE})} = 0.196V$$

### 1.4 Photocatalytic water oxidation

The photocatalytic oxygen evolution tests of the samples were evaluated. 20 mg

photocatalyst, 0.13 g  $\text{La}_2\text{O}_3$  and 0.1 g  $\text{AgNO}_3$  were dispersed in 100 mL water.  $\text{La}_2\text{O}_3$  was used to maintain the pH value of the solution and  $\text{AgNO}_3$  was used as the electron sacrificial reagent for the photocatalytic oxygen evolution reaction. Before the visible-light irradiation, the suspension was fully deaerated to ensure the air was completely removed. A 300 W Xenon lamp was used as the visible-light source.  $\text{O}_2$  evolved was measured by the gas chromatography (GC, D7900).

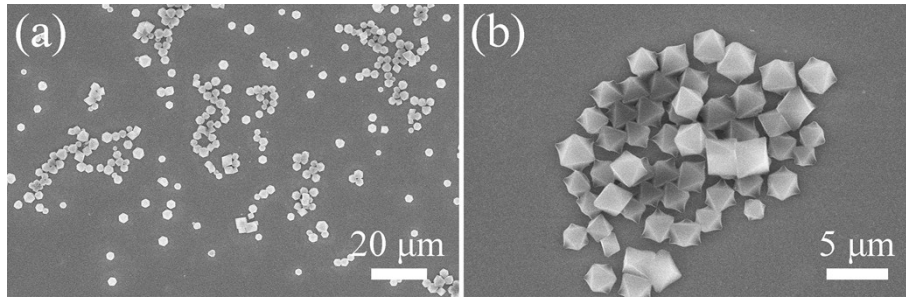

Fig. S1. (a) and (b) SEM images of MIL-101(Fe) with different magnifications.

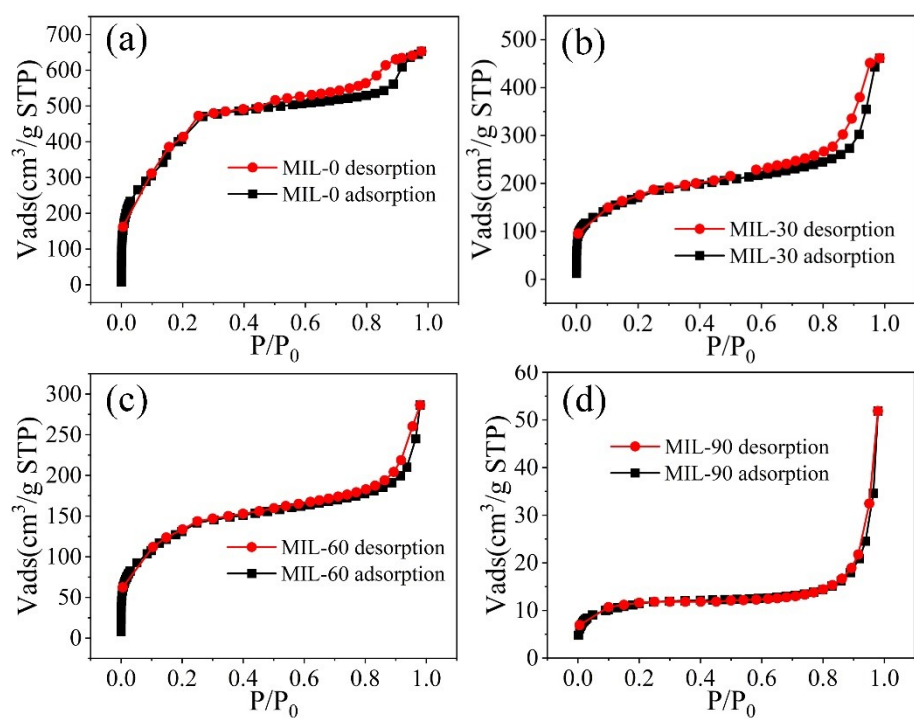

Fig. S2.  $N_2$  adsorption-desorption isotherms of (a) MIL-0, (b) MIL-30, (c) MIL-60 and (d) MIL-90.

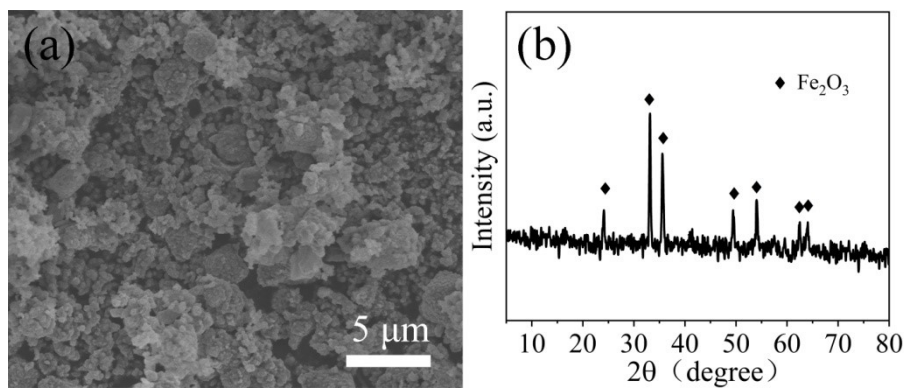

Fig. S3. (a) SEM image and (b) XRD pattern of Fe<sub>2</sub>O<sub>3</sub> obtained by calcining the MIL-101(Fe).

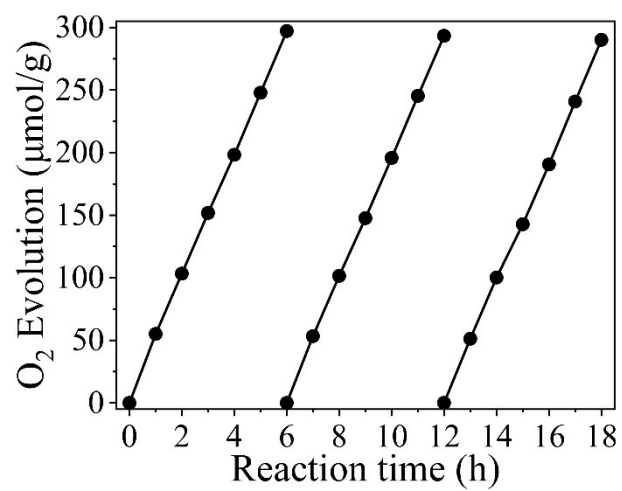

Fig. S4. Cyclic O<sub>2</sub> production over MIL-90 photocatalyst.

Table S1 Catalytic performance of iron oxide-based electrocatalyst

| Catalyst                                      | Electrolyte                          | Current density<br>(mA/cm <sup>2</sup> ) | Reference    |
|-----------------------------------------------|--------------------------------------|------------------------------------------|--------------|
| Ti:Fe <sub>2</sub> O <sub>3</sub>             | 1M NaOH                              | 0.09                                     | [1]          |
| Fe <sub>2</sub> O <sub>3</sub> nanorod arrays | 1M KOH                               | 0.12                                     | [2]          |
| Fe <sub>2</sub> O <sub>3</sub>                | 0.1M Na <sub>2</sub> SO <sub>4</sub> | 0.25                                     | [3]          |
| Fe <sub>2</sub> O <sub>3</sub>                | 1M NaOH                              | 0.10                                     | [4]          |
| Fe <sub>2</sub> O <sub>3</sub>                | 0.1M NaOH                            | 0.08                                     | [5]          |
| Fe <sub>2</sub> O <sub>3</sub> nanorods       | 0.1M Na <sub>2</sub> SO <sub>4</sub> | 0.11                                     | Present work |

## Reference

1. J. Xie, P. Yang, X. Liang and J. Xiong, *ACS Appl. Energy Mater.* 2018, **1**, 2769-2775.
2. T. Tokubuchi, R. I. Arbi, P. Zhenhua, K. Katayama, A. Turak and W. Y. Sohn, *J. Photoch. Photobio. A.* 2021, **410**, 113179-113186.
3. S. Liu, L. Zheng, P. Yu, S. Han and X. Fang, *Adv. Funct. Mater.* 2016, **26**, 3331-3339.
4. A. Rokade, Y. Jadhav, S. Jathar, S. Rahane, S. Barma, G. Rahane, S. Thawarkar, P. Vairale, A. Punde, S. Shah, S. R. Rondiya, N. Y. Dzade, B. Pandit, J. Pawar, A. Roy and S. Jadkar, *Eng. Sci.* 2022, **17**, 242-255.
5. J. Wang, J. L. Waters, P. Kung, S. M. Kim, J. T. Kelly, L. E. McNamara, N. I. Hammer, B. C. Pemberton, R. H. Schmehl, A. Gupta and S. Pan, *ACS Appl. Mater. Interfaces.* 2017, **9**, 381-390.
